# Supplementary material
Source: PubMed Central journal article supplement (PMC5876147)
Supplement: NIHMS939271-supplement-Supplemental1.pdf [file NIHMS939271-supplement-Supplemental1.pdf]

**Table 1.** Health System – Law Enforcement Surveillance Articles

| <b>First Author<br/>Last Name</b> | <b>Year</b> | <b>Title</b>                                                                                                                                                                     | <b>Country</b> | <b>Injury Mechanism</b> |
|-----------------------------------|-------------|----------------------------------------------------------------------------------------------------------------------------------------------------------------------------------|----------------|-------------------------|
| Archer et al.                     | 1998        | Oklahoma firearm-related injury surveillance                                                                                                                                     | United States  | Interpersonal Violence  |
| Barber et al.                     | 1998        | Massachusetts weapon-related injury surveillance system                                                                                                                          | United States  | Interpersonal Violence  |
| Boyle et al.                      | 2005        | Record linkage of domestic assault victims between an emergency department and the police                                                                                        | United Kingdom | Interpersonal Violence  |
| Clough et al.*                    | 2013        | Alcohol, assault and licensed premises in inner-city areas                                                                                                                       | Australia      | Interpersonal Violence  |
| Cooper et al.                     | 2006        | Hospital-based violence intervention programs work                                                                                                                               | United States  | Interpersonal Violence  |
| Davis et al.                      | 1997        | More guns and younger assailants: A combined police and trauma center study                                                                                                      | United States  | Interpersonal Violence  |
| Descallar et al.                  | 2012        | The association between the incidence of emergency department attendances for alcohol problems and assault incidents attended by police in New South Wales, Australia, 2003-2008 | Australia      | Interpersonal Violence  |
| Howe et al.                       | 2002        | Identification and characteristics of victims of violence identified by emergency physicians, triage nurses, and the police                                                      | United Kingdom | Interpersonal Violence  |
| Kellerman et al.                  | 2001        | Community-level firearm injury surveillance                                                                                                                                      | United States  | Interpersonal Violence  |
| Kellerman et al.                  | 1996        | Injuries due to firearms in three cities                                                                                                                                         | United States  | Interpersonal Violence  |
| Kothari et al.                    | 2006        | Missed opportunities: Emergency department visits by police-identified victims of intimate partner violence                                                                      | United States  | Interpersonal Violence  |
| Lipsky et al.                     | 2009        | Racial and ethnic disparities in police-reported intimate partner violence and risk of hospitalization among women                                                               | United States  | Interpersonal Violence  |
| Moore et al.                      | 2011        | Predicting and measuring premises-level harm in the night-time economy                                                                                                           | United Kingdom | Interpersonal Violence  |
| Rivara et al.                     | 1995        | Victim as offender in youth violence                                                                                                                                             | United Kingdom | Interpersonal Violence  |
| Shepherd                          | 1997        | Violence: The relation between seriousness of injury and outcome in the criminal justice system                                                                                  | United Kingdom | Interpersonal Violence  |

|                    |      |                                                                                                                                                |                |                        |
|--------------------|------|------------------------------------------------------------------------------------------------------------------------------------------------|----------------|------------------------|
| Shepherd et al.    | 1993 | Trends in urban violence: A comparison of accident department and police records                                                               | United Kingdom | Interpersonal Violence |
| Shepherd et al.    | 2010 | An audit of emergency medicine responses to children injured in violence                                                                       | United Kingdom | Interpersonal Violence |
| Sutherland et al.* | 2002 | Recording of community violence by medical and police services                                                                                 | United Kingdom | Interpersonal Violence |
| Van Tuinen et al.  | 1998 | Missouri firearm-related injury surveillance system                                                                                            | United States  | Interpersonal Violence |
| Wadman et al.      | 1999 | Domestic violence homicides: ED use before victimization                                                                                       | United States  | Interpersonal Violence |
| Ward et al.        | 2011 | Integrating medical examiner and police report data                                                                                            | United States  | Interpersonal Violence |
| Rahman et al.      | 2000 | Potential of using existing injury information for injury surveillance at the local level in developing countries: Experiences from Bangladesh | Bangladesh     | Multiple Forms         |
| Sauaia et al.      | 1995 | Epidemiology of trauma deaths: A reassessment                                                                                                  | United States  | Multiple Forms         |
| Farooq et al.      | 2010 | Differences in reporting of violence and deliberate self harm related injuries to health and police authorities, Rawalpindi, Pakistan          | Pakistan       | Other                  |
| Abegaz et al.      | 2014 | Road traffic deaths and injuries are under-reported in Ethiopia: A capture-recapture method                                                    | Ethiopia       | Road Traffic           |
| Alsop & Langley    | 2001 | Under-reporting of motor vehicle traffic crash victims in New Zealand                                                                          | New Zealand    | Road Traffic           |
| Amoros et al.      | 2008 | Actual incidences of road casualties, and their injury severity, modelled from police and hospital data, France                                | France         | Road Traffic           |
| Aptel et al.       | 1999 | Road accident statistics: Discrepancies between police and hospital data in a French island                                                    | France         | Road Traffic           |
| Bhalla et al.      | 2010 | Estimating the incidence of road traffic fatalities and injuries in Sri Lanka using multiple data sources                                      | Sri Lanka      | Road Traffic           |
| Bhalla et al.      | 2009 | Methods for developing country level estimates of the incidence of deaths and non-fatal injuries from road traffic crashes                     | Multiple       | Road Traffic           |
| Bhatti et al.      | 2011 | Differences in police, ambulance, and emergency department reporting of traffic injuries on Karachi-Hala road, Pakistan                        | Pakistan       | Road Traffic           |

---

|                   |      |                                                                                                                                                      |                |              |
|-------------------|------|------------------------------------------------------------------------------------------------------------------------------------------------------|----------------|--------------|
| Broughton et al.  | 2010 | Estimation of the real number of road casualties in Europe                                                                                           | Multiple       | Road Traffic |
| Brown et al.      | 2014 | Restraint use and injury patterns of young drivers and passengers admitted to hospitals in New South Wales, Australia                                | Australia      | Road Traffic |
| Campbell et al.   | 2014 | Down but not out: Incidence and estimated costs to society of road casualties in Strathclyde, Scotland                                               | United Kingdom | Road Traffic |
| Cercarelli et al. | 1996 | Comparison of accident and emergency with police road injury data                                                                                    | Australia      | Road Traffic |
| Cryer et al.      | 2001 | Investigation of bias after data linkage of hospital admissions data to police road traffic reports                                                  | United Kingdom | Road Traffic |
| Dhillon et al.    | 2001 | Assessment of hospital and police ascertainment of automobile versus childhood pedestrian and bicyclist collisions                                   | United States  | Road Traffic |
| Ferreira et al.   | 2015 | The quality of the injury severity classification by the police: An important step for a reliable assessment                                         | Portugal       | Road Traffic |
| Galanis et al.    | 2014 | Helmet use among motorcycle and moped riders injured in Hawaii: Final medical dispositions from a linked database                                    | United States  | Road Traffic |
| Gill et al.       | 2006 | Changes in safety on England's roads: Analysis of hospital statistics                                                                                | United Kingdom | Road Traffic |
| Gonzalez et al.   | 2006 | Increased mortality in rural vehicular trauma: Identifying contributing factors through data linkage                                                 | United States  | Road Traffic |
| Grant et al.      | 1998 | The accuracy of medical records and police reports in determining motor vehicle crash characteristics                                                | United States  | Road Traffic |
| Grant et al.      | 2000 | A comparison of data sources for motor vehicle crash characteristic accuracy                                                                         | United States  | Road Traffic |
| Hutchinson        | 2008 | Linkage of police and hospital data on road crashes                                                                                                  | Multiple       | Road Traffic |
| Jeffrey et al.    | 2009 | An evaluation of police reporting of road casualties                                                                                                 | United Kingdom | Road Traffic |
| Juhra et al.      | 2012 | Bicycle accidents- Do we only see the tip of the iceberg? A prospective multi-centre study in a large German city combining medical and police data. | Germany        | Road Traffic |

---

|                  |      |                                                                                                                                                                  |                |              |
|------------------|------|------------------------------------------------------------------------------------------------------------------------------------------------------------------|----------------|--------------|
| Kanny et al.     | 2003 | Motorcycle casualties sustained during Daytona Beach bike week 2000                                                                                              | United States  | Road Traffic |
| Kraus et al.     | 1994 | The effect of the 1992 California motorcycle helmet use law on motorcycle crash fatalities and injuries                                                          | United States  | Road Traffic |
| Kraus et al.     | 1996 | Child pedestrian and bicyclist injuries: Results of community surveillance and a case-control study.                                                             | United States  | Road Traffic |
| Lapidus et al.   | 1991 | Child pedestrian injury: A population-based collision and injury severity profile                                                                                | United States  | Road Traffic |
| Leonard et al.   | 1999 | Under representation of morbidity from paediatric bicycle accidents by official statistics - A need for data collection in the accident and emergency department | United Kingdom | Road Traffic |
| Leung et al.     | 2013 | Predictors of outcomes of pedestrian casualties in motor vehicle injuries managed in emergency department                                                        | Hong Kong      | Road Traffic |
| Loo et al.       | 2007 | Factors affecting the likelihood of reporting road crashes resulting in medical treatment to the police                                                          | Hong Kong      | Road Traffic |
| Lopez et al.     | 2012 | Using trauma center data to identify missed bicycle injuries and their associated costs                                                                          | United States  | Road Traffic |
| Lujic et al.     | 2008 | How comparable are road traffic crash cases in hospital admissions data and police records? an examination of data linkage rates                                 | Multiple       | Road Traffic |
| Lyons et al.     | 2008 | Using multiple datasets to understand trends in serious road traffic casualties                                                                                  | United Kingdom | Road Traffic |
| Martiello et al. | 2007 | Road traffic injuries in the province of Grosseto                                                                                                                | Italy          | Road Traffic |
| Mitchell et al.  | 2013 | Can SNOMED CT as implemented in new south wales, Australia be used for road trauma injury surveillance in emergency departments?                                 | Australia      | Road Traffic |
| Mitchell et al.  | 2015 | Risk factors associated with the severity of injury outcome for paediatric road trauma                                                                           | Australia      | Road Traffic |
| Mitchell et al.  | 2015 | Injury risk for matched front and rear seat car passengers by injury severity and crash type: An exploratory study                                               | Australia      | Road Traffic |
| Olkkonen et al.  | 1990 | Incidence and characteristics of bicycle injuries by source of information                                                                                       | Finland        | Road Traffic |

|                           |      |                                                                                                                                                                                             |               |              |
|---------------------------|------|---------------------------------------------------------------------------------------------------------------------------------------------------------------------------------------------|---------------|--------------|
| Peleg et al.              | 2004 | Road traffic accidents severe injuries decision making on the basis of partial data                                                                                                         | Israel        | Road Traffic |
| Pfotmueller et al.        | 2014 | Injury severity and mortality of adult zebra crosswalk and non-zebra crosswalk road crossing accidents: A cross-sectional analysis                                                          | Switzerland   | Road Traffic |
| Qiu et al.                | 2015 | Chinese traffic fatalities and injuries in police reports, hospital records, and in-depth records from one city                                                                             | China         | Road Traffic |
| Rosman                    | 1996 | The feasibility of linking hospital and police road crash casualty records without names                                                                                                    | Australia     | Road Traffic |
| Rosman et al.             | 1994 | A comparison of hospital and police road injury data                                                                                                                                        | Australia     | Road Traffic |
| Sango et al.              | 2016 | Mortality and morbidity of urban road traffic crashes in Africa: Capture-recapture estimates in Bamako, Mali                                                                                | Mali          | Road Traffic |
| Sarkar et al.             | 1995 | Fatal injuries in motorcycle riders according to helmet use                                                                                                                                 | United States | Road Traffic |
| Sciortino et al.          | 2005 | San Francisco pedestrian injury surveillance: Mapping, under-reporting and injury severity in police and hospital records                                                                   | United States | Road Traffic |
| Skjerven-Martinsen et al. | 2014 | A prospective study of children aged <16 years in motor vehicle collisions in Norway: Severe injuries are observed predominantly in older children and are associated with restraint misuse | Norway        | Road Traffic |
| Soori et al.              | 2011 | Epidemiological pattern of road traffic injuries in Tehran-Abali Axis in 2008: A prospective study                                                                                          | Iran          | Road Traffic |
| States et al.             | 1990 | A time comparison study of the New York state safety belt use law                                                                                                                           | United States | Road Traffic |
| Tarko et al.              | 2011 | Pedestrian injury analysis with consideration of the selectivity bias in linked police-hospital data                                                                                        | United States | Road Traffic |
| Tarko et al.              | 2010 | Model-based application of abbreviated injury scale to police-reported crash injuries                                                                                                       | United States | Road Traffic |
| Tercero et al.            | 2004 | Measuring transport injuries in a developing country: An application of the capture-recapture method                                                                                        | Nicaragua     | Road Traffic |
| Tin Tin et al.            | 2013 | Completeness and accuracy of crash outcome data in a cohort of cyclists: A validation study                                                                                                 | New Zealand   | Road Traffic |

|                  |      |                                                                                                                                        |               |                 |
|------------------|------|----------------------------------------------------------------------------------------------------------------------------------------|---------------|-----------------|
| Van et al.       | 2006 | Estimation of non-fatal road traffic injuries in Thai Nguyen, Vietnam using capture-recapture method                                   | Vietnam       | Road Traffic    |
| Watson et al.    | 2015 | Estimating under-reporting of road crash injuries to police using multiple linked data collections                                     | Australia     | Road Traffic    |
| Wilson et al.    | 2012 | Validity of United linked hospital and police traffic crash reports                                                                    | New Zealand   | Road Traffic    |
| Zhao et al.      | 2009 | Risk factors for urban road traffic injuries in Hangzhou, China                                                                        | China         | Road Traffic    |
| Brubacher et al. | 2013 | Police documentation of alcohol involvement in hospitalized injured drivers                                                            | Canada        | Substance Abuse |
| Fieldus et al.   | 2012 | Impaired driving charges in injured impaired drivers requiring treatment in an emergency department                                    | Canada        | Substance Abuse |
| Grossman et al.  | 1996 | The validity of police assessment of driver intoxication in motor vehicle crashes leading to hospitalization                           | United States | Substance Abuse |
| Orsay et al.     | 1994 | The impaired driver: Hospital and police detection of alcohol and other drugs of abuse in motor vehicle crashes                        | United States | Substance Abuse |
| Pursell et al.   | 2004 | Proportion of injured alcohol-impaired drivers subsequently convicted of an impaired driving criminal code offence in British Columbia | Canada        | Substance Abuse |
| Tsui et al.      | 2010 | Association between drink driving and severity of crash injuries to road users                                                         | Hong Kong     | Substance Abuse |

Note: \* indicates an article fell into both surveillance and partnership categories.
