# Supplementary material
Source: PubMed Central journal article supplement (PMC5876147)
Supplement: NIHMS939271-supplement-Supplemental2.pdf [file NIHMS939271-supplement-Supplemental2.pdf]

**Table 2.** Health System – Law Enforcement Partnership Articles

| <b>First Author Last Name</b> | <b>Year</b> | <b>Title</b>                                                                                                                                                                  | <b>Country</b> | <b>Injury Mechanism</b> |
|-------------------------------|-------------|-------------------------------------------------------------------------------------------------------------------------------------------------------------------------------|----------------|-------------------------|
| Ali et al.                    | 2006        | Emergency medical services in Islamabad, Pakistan                                                                                                                             | Pakistan       | Emergency Response      |
| Glick et al.                  | 2004        | Emergency preparedness: One community's response                                                                                                                              | United States  | Emergency Response      |
| Glow et al.                   | 2013        | Managing multiple-casualty incidents: A rural medical preparedness training assessment                                                                                        | United States  | Emergency Response      |
| Allen et al.                  | 2014        | Nurse-police coalition improves safety in acute psychiatric hospital                                                                                                          | United States  | Interpersonal Violence  |
| Bellis et al.                 | 2012        | Nighttime assaults: Using a national emergency department monitoring system to predict occurrence, target prevention and plan services                                        | United Kingdom | Interpersonal Violence  |
| Bleetman et al.               | 1997        | Effect of Strathclyde police initiative 'Operation Blade' on accident and emergency attendances due to assault                                                                | United Kingdom | Interpersonal Violence  |
| Boyle et al.                  | 2012        | External validation of the Cardiff Model of information sharing to reduce community violence: Natural experiment                                                              | United Kingdom | Interpersonal Violence  |
| Brennan et al.                | 2012        | Integrating emergency department and police data to locate and prevent violence: The Cardiff Model                                                                            | United Kingdom | Interpersonal Violence  |
| Clough et al.*                | 2013        | Alcohol, assault and licensed premises in inner-city areas                                                                                                                    | Australia      | Interpersonal Violence  |
| Davison et al.                | 2010        | Process evaluation of data sharing between emergency departments and community safety partnerships in the South East                                                          | United Kingdom | Interpersonal Violence  |
| Florence et al.               | 2011        | Effectiveness of anonymised information sharing and United States in the health service, police and local government partnership: Experimental study and time series analysis | United Kingdom | Interpersonal Violence  |
| Florence et al.               | 2014        | An economic evaluation of anonymised information sharing in a partnership between health services, police and local government for preventing violence-related injury         | United Kingdom | Interpersonal Violence  |
| Goodwin et al.                | 2000        | The development of an assault patient questionnaire to allow accident and emergency departments to contribute to Crime and Disorder Act local crime audits                    | United Kingdom | Interpersonal Violence  |

|                       |      |                                                                                                                                                                                    |                |                        |
|-----------------------|------|------------------------------------------------------------------------------------------------------------------------------------------------------------------------------------|----------------|------------------------|
| Jennings-Bey et al.   | 2015 | The trauma response team: A community intervention for gang violence                                                                                                               | United States  | Interpersonal Violence |
| Kaplan et al.         | 2014 | Embedding a surgeon in a civilian tactical team reduces resource utilization and is cost effective                                                                                 | United States  | Interpersonal Violence |
| Karchmer et al.       | 2003 | New pressures/new partnerships: Public health and law enforcement                                                                                                                  | United States  | Interpersonal Violence |
| Kmietowicz            | 2013 | Sharing information on violence saved Cardiff £7m in health, legal, and social costs in 2007                                                                                       | United Kingdom | Interpersonal Violence |
| Metzger et al.        | 2009 | The lifesaving potential of specialized on-scene medical support for urban tactical operations                                                                                     | United States  | Interpersonal Violence |
| Shepherd et al.       | 1998 | Towards multi-agency violence prevention and victim support: An investigation of police-accident and emergency service liaison                                                     | United Kingdom | Interpersonal Violence |
| Sivarajasingam et al. | 2003 | Effect of urban closed circuit television on assault injury and violence detection                                                                                                 | United Kingdom | Interpersonal Violence |
| Sutherland et al.*    | 2002 | Recording of community violence by medical and police services                                                                                                                     | United Kingdom | Interpersonal Violence |
| Vainionpaa et al.     | 2012 | Integrated model for providing tactical emergency medicine support (TEMS): Analysis of 120 tactical situations                                                                     | Finland        | Interpersonal Violence |
| Warburton et al.      | 2004 | Development, utilization, and importance of accident and emergency department derived assault data in violence management                                                          | United Kingdom | Interpersonal Violence |
| Young et al.          | 2003 | Uses of and outputs from an assault patient questionnaire within accident and emergency departments on Merseyside                                                                  | United Kingdom | Interpersonal Violence |
| Cottrell et al.       | 1999 | CLEPS: How police and hospital security work together in a large city                                                                                                              | United States  | Multiple Forms         |
| Doezema et al.        | 2002 | An approach to fulfilling the systems-based practice competency requirement                                                                                                        | United States  | Multiple Forms         |
| Miller et al.         | 2011 | Dealing with alcohol-related problems in the night-time economy: A study protocol for mapping trends in harm and stakeholder views surrounding local community level interventions | United Kingdom | Multiple Forms         |

---

|                  |      |                                                                                                                                                                                |                |                 |
|------------------|------|--------------------------------------------------------------------------------------------------------------------------------------------------------------------------------|----------------|-----------------|
| Shepherd et al.  | 2005 | Injury research explains conflicting violence trends                                                                                                                           | United Kingdom | Multiple Forms  |
| Shepherd         | 2007 | Preventing violence-caring for victims                                                                                                                                         | United Kingdom | Multiple Forms  |
| Hunt et al.      | 2002 | Treatment, custody, support: An exploratory qualitative dialogue to map the ethics of interagency co-operation in hospital emergency departments in the UK and the Netherlands | Multiple       | Other           |
| McCue            | 2001 | Cops and Docs program brings police and ED staff together to address the cycle of violence                                                                                     | United States  | Other           |
| Petch            | 2008 | Safety matters: The role of partnership working in safeguarding adults                                                                                                         | United Kingdom | Other           |
| Shepherd         | 2001 | Emergency medicine and police collaboration to prevent community violence                                                                                                      | United Kingdom | Other           |
| Farrow et al.    | 2006 | CHP: Reducing traffic fatalities and injuries through cooperation and partnership                                                                                              | United States  | Road Traffic    |
| Galey et al.     | 2010 | Recidivism rates of teen driving trauma prevention program in Birmingham, Alabama                                                                                              | United States  | Road Traffic    |
| Loo et al.       | 2012 | Multidisciplinary efforts toward sustained road safety benefits: Integrating place-based and people-based safety analyses                                                      | Hong Kong      | Road Traffic    |
| Razzak et al.    | 2012 | A successful model of road traffic injury surveillance in a developing country: process and lessons learnt                                                                     | Pakistan       | Road Traffic    |
| Schuch et al.    | 2015 | Breaking out of surveillance silos: Integrative geospatial data collection for child injury risk and active school transport                                                   | United States  | Road Traffic    |
| Ytterstad et al. | 1995 | The Harstad Injury Prevention Study: Evaluation of hospital-based injury recording and community-based intervention for traffic injury prevention                              | Norway         | Road Traffic    |
| Benger et al.    | 2008 | Could inter-agency working reduce emergency department attendances due to alcohol consumption                                                                                  | United Kingdom | Substance Abuse |
| Maguire et al.   | 2003 | Reducing alcohol-related violence and disorder: An evaluation of the "TASC" project                                                                                            | United Kingdom | Substance Abuse |

---

|                  |      |                                                                                                                                                                                              |                |                 |
|------------------|------|----------------------------------------------------------------------------------------------------------------------------------------------------------------------------------------------|----------------|-----------------|
| Quigg et al.     | 2011 | Data Sharing for prevention: A case study in the development of a comprehensive emergency department injury surveillance system and its use in preventing violence and alcohol-related harms | United Kingdom | Substance Abuse |
| Roeper et al.    | 2000 | Long-term community-wide intervention to reduce alcohol-related traffic injuries: Salinas, California                                                                                        | United States  | Substance Abuse |
| Warburton et al. | 2006 | Tackling alcohol related violence in city centres                                                                                                                                            | United Kingdom | Substance Abuse |

Note: \* indicates an article fell into both surveillance and partnership categories.
